# Supplementary material for: The potential environmental and climate impacts of stratospheric aerosol injection: a review
Source: Royal Society of Chemistry journal article supplement (doi:10.1039/d3ea00134b), 2024-01-01
Supplement: d3ea00134b1.pdf [file d3ea00134b1.pdf]

## SUPPORTING INFORMATION FOR:

# The Potential Environmental and Climate Impacts of Stratospheric Aerosol Injection: A Review

Han N. Huynh, V. Faye McNeill

Contents: 4 pages, 1 tables

**Table S1.** A summary of model specifications and description of base case scenarios listed in Table 1. Specifications of SRM scenario that are relevant to the discussion are included in Table 1.

| Model                                                                              | Altitude Limit                                                                                                                                                                                                                  | # vertical layers | Horizontal resolution (latitude × longitude) | SRM scenario                                                                                                            | Aerosol or gas-precursor injection altitude                    | Included chemistry model? | Included ocean model?        | Ref. |
|------------------------------------------------------------------------------------|---------------------------------------------------------------------------------------------------------------------------------------------------------------------------------------------------------------------------------|-------------------|----------------------------------------------|-------------------------------------------------------------------------------------------------------------------------|----------------------------------------------------------------|---------------------------|------------------------------|------|
| WACCM3                                                                             | 4.5 × 10 <sup>-6</sup> hPa (~150 km)                                                                                                                                                                                            | L66               | 1.9° × 2.5°                                  | Geo-eng                                                                                                                 | 25 km<br>10°N–10°S                                             | ✓                         | Prescribed ocean heat fluxes | 1    |
|                                                                                    | <u>Base case:</u> REF2 has increasing greenhouse gases (GHGs) based on A1B scenario in the 2007 IPCC report. Aerosol surface area density and sulfate mass are specified based on a non-volcanic period as measured by SAGE II. |                   |                                              |                                                                                                                         |                                                                |                           |                              |      |
| AER-2D<br>CCM SOCOLv2.0                                                            | 0.01 hPa                                                                                                                                                                                                                        | L39               | 3.75°                                        | GEO1<br>GEO2<br>GEO5<br>GEO10<br>GEO5p12<br>GEO5p2                                                                      | Equator (5°S–5°N)<br>20 km (19.4–20.6 km)                      | ✓                         | Prescribed SSTs <sup>a</sup> | 2    |
|                                                                                    | <u>Base case:</u> GEO0 has background S concentrations.                                                                                                                                                                         |                   |                                              |                                                                                                                         |                                                                |                           |                              |      |
| GISS ModelE2                                                                       | 0.1 mb (~80 km)                                                                                                                                                                                                                 | L40               | 2° × 2.5°                                    | Def (default)<br>HA (High Altitude)<br>SmR (Small Radius)<br>LgR (Large Radius)<br>HALgR (High Altitude + Large Radius) | 100–150 mb<br>20–57 mb<br>100–150 mb<br>100–150 mb<br>20–57 mb | ✓                         | Prescribed SSTs              | 3    |
|                                                                                    | <u>Base case:</u> Con (control run) is kept constant at 2000 conditions.                                                                                                                                                        |                   |                                              |                                                                                                                         |                                                                |                           |                              |      |
| ECHAM5-HAM                                                                         |                                                                                                                                                                                                                                 |                   |                                              | GE                                                                                                                      | Equator (10°N–10°S)                                            | ✓                         | ✓                            | 4    |
|                                                                                    | <u>Base case:</u> Control simulation were run over a 5-year period (1991–1995) to reflect the atmosphere after the eruption of Mt. Pinatubo in 1991.                                                                            |                   |                                              |                                                                                                                         |                                                                |                           |                              |      |
| IGCM                                                                               | 0.1 hPa                                                                                                                                                                                                                         |                   |                                              | 4CO <sub>2</sub> + Sulfate                                                                                              | ~50 hPa                                                        | --                        | Prescribed SSTs              | 5    |
| <u>Base case:</u> Control simulation set CO <sub>2</sub> mixing ratio as 350 ppmv. |                                                                                                                                                                                                                                 |                   |                                              |                                                                                                                         |                                                                |                           |                              |      |
| ULAQ-CCM                                                                           | 0.04 hPa                                                                                                                                                                                                                        | L126              | 5° × 6°                                      | G3                                                                                                                      | Equator (0° longitude)                                         | ✓                         | Prescribed SSTs              | 6    |

|                                                                                                                                                                                                                         |                      |                      |                |                                                                                                                                 |                                    |    |                              |    |
|-------------------------------------------------------------------------------------------------------------------------------------------------------------------------------------------------------------------------|----------------------|----------------------|----------------|---------------------------------------------------------------------------------------------------------------------------------|------------------------------------|----|------------------------------|----|
|                                                                                                                                                                                                                         |                      |                      |                | G4                                                                                                                              | 18–24 km                           |    |                              |    |
| GISS-E2-R                                                                                                                                                                                                               | 0.1 hPa              | L40                  | 2° × 2.5°      | G3<br>G4                                                                                                                        | Equator (0° longitude)<br>16–25 km | ✓  | Coupled<br>(1° × 1.25°, L32) | 6  |
| MIROC-ESM-<br>CHEM                                                                                                                                                                                                      | 0.01 hPa<br>(~85 km) | L80                  | 2° × 2.5°      | G4                                                                                                                              | Prescribed AOD <sup>b</sup>        | ✓  | Coupled                      | 6  |
| GEOSCCM                                                                                                                                                                                                                 | 0.01 hPa             | L72                  | 2° × 2.5°      | G4                                                                                                                              | Equator (0° longitude)<br>16–25 km | ✓  | Prescribed SSTs              | 6  |
| <u>Base case:</u> RCP4.5 represents a future projection where the radiative forcing will increase steadily until it reaches 4.5 W m <sup>-2</sup> (2005–2100) .<br>Historical data was used for 1860–2005. <sup>7</sup> |                      |                      |                |                                                                                                                                 |                                    |    |                              |    |
| AER 2-D                                                                                                                                                                                                                 | ~60 km               | 1.2 km<br>resolution | 9.5°           | Al <sub>2</sub> O <sub>3</sub> (0.08, 0.16, 0.24<br>µm)<br>Diamond                                                              | 30°S–30°N<br>20–25 km              | ✓  | --                           | 8  |
| <u>Base case:</u>                                                                                                                                                                                                       |                      |                      |                |                                                                                                                                 |                                    |    |                              |    |
| HadGEM2-CCS                                                                                                                                                                                                             | 84 km                | L60                  | 1.25° × 1.875° | geoSulf<br>geoBC<br>geoTiO <sub>2</sub>                                                                                         | Equator<br>23–28 km                | ✓  | Coupled<br>(1° × 1°, L40)    | 9  |
| <u>Base case:</u> RCP8.5 represents a future projection where the radiative forcing will increase steadily until it reaches 8.5 W m <sup>-2</sup> (2005–2100) .<br>Historical data was used for 1860–2005. <sup>7</sup> |                      |                      |                |                                                                                                                                 |                                    |    |                              |    |
| RRTM                                                                                                                                                                                                                    | --                   | --                   | --             | Rutile<br>Anatase<br>α-SiC<br>Diamond<br>α-ZrO <sub>2</sub><br>α-Al <sub>2</sub> O <sub>3</sub><br>CaCO <sub>3</sub><br>Sulfate | 18–23 km                           | -- | --                           | 10 |
| <u>Base case:</u> Annual-average, zonally averaged data for 15°S to 15°N.                                                                                                                                               |                      |                      |                |                                                                                                                                 |                                    |    |                              |    |
| AER 2-D                                                                                                                                                                                                                 | ~60 km               | 1.2 km<br>resolution | 9.5°           | CaCO <sub>3</sub>                                                                                                               | 30°S–30°N<br>20–25 km              | ✓  | --                           | 11 |
| <u>Base case:</u> RCP6.0 represents a future projection where the radiative forcing will increase steadily until it reaches 6.0 W m <sup>-2</sup> (2005–2100) .<br>Historical data was used for 1860–2005. <sup>7</sup> |                      |                      |                |                                                                                                                                 |                                    |    |                              |    |

|                                                                                                                                                                                                              |                                         |                      |                |                    |                                         |    |         |       |
|--------------------------------------------------------------------------------------------------------------------------------------------------------------------------------------------------------------|-----------------------------------------|----------------------|----------------|--------------------|-----------------------------------------|----|---------|-------|
| HadGEM2-ES                                                                                                                                                                                                   | ~40 km                                  | L38                  | 1.25° × 1.875° | G4<br>G4NH<br>G4SH | 16–25 km                                | ✓  | Coupled | 12    |
| Base case: RCP4.5 represents a future projection where the radiative forcing will increase steadily until it reaches 4.5 W m <sup>-2</sup> (2005–2100). Historical data (HIST) was used for 1860–2005.       |                                         |                      |                |                    |                                         |    |         |       |
| CESM CAM4-chem                                                                                                                                                                                               | 3.5 mb<br>(~40 km)                      | L26                  | 0.9° × 1.25°   | G4SSA              | 60 mb                                   | ✓  | Coupled | 13    |
| Base case: RCP6.0 represents a future projection where the radiative forcing will increase steadily until it reaches 6.0 W m <sup>-2</sup> (2005–2100). Historical data was used for 1860–2005. <sup>7</sup> |                                         |                      |                |                    |                                         |    |         |       |
| MPI-ESM                                                                                                                                                                                                      | 0.01 hPa                                | L47                  | 1.9°           | G3                 | Equator                                 | ✓  | Coupled | 14    |
| Base case: RCP4.5 represents a future projection where the radiative forcing will increase steadily until it reaches 4.5 W m <sup>-2</sup> (2005–2100). Historical data (HIST) was used for 1860–2005.       |                                         |                      |                |                    |                                         |    |         |       |
| AER 2-D                                                                                                                                                                                                      | ~60 km                                  | 1.2 km<br>resolution | 9.5°           | CaCO <sub>3</sub>  | 30°S–30°N<br>20–25 km                   | ✓  | --      | 15    |
| Base case: RCP6.0 represents a future projection where the radiative forcing will increase steadily until it reaches 6.0 W m <sup>-2</sup> (2005–2100). Historical data was used for 1860–2005. <sup>7</sup> |                                         |                      |                |                    |                                         |    |         |       |
| CESM2 (WACCM)                                                                                                                                                                                                | 4.5 × 10 <sup>-6</sup> hPa<br>(~130 km) | L70                  | 0.9° × 1.25°   | G6sulfur           | Equator<br>25 km                        | ✓  | Coupled | 16,17 |
| CNRM-ESM2-1                                                                                                                                                                                                  | 0.01 hPa                                | L91                  | 1°             | G6sulfur           | Prescribed AOD                          | ✓  | Coupled | 16,17 |
| ISPL-CM6A-LR                                                                                                                                                                                                 | 80 km                                   | L79                  | 1.3° × 2.5°    | G6sulfur           | 10°S–10°N<br>(0° longitude)<br>18–20 km | -- | Coupled | 16,17 |
| MPI-ESM1.2-LR                                                                                                                                                                                                | 0.01 hPa                                | L47                  | 1.9°           | G6sulfur           | Prescribed AOD                          | -- | Coupled | 16,17 |
| MPI-ESM1.2-HR                                                                                                                                                                                                | 0.01 hPa                                | L95                  | 0.93°          | G6sulfur           | Prescribed AOD                          | -- | Coupled | 16,17 |
| UKESM1-0-LL                                                                                                                                                                                                  | 85 km                                   | L85                  | 1.25° × 1.875° | G6sulfur           | 10°S–10°N<br>(0° longitude)<br>18–20 km | ✓  | Coupled | 16,17 |
| Base case: SSP5-8.5 represents a Shared Socioeconomic Pathway long-term extension scenario whose details are listed in O'Neill et al. (2016). <sup>18</sup>                                                  |                                         |                      |                |                    |                                         |    |         |       |

<sup>a</sup> Sea surface temperatures (SSTs) and sometimes sea ice were prescribed with an average value instead of a fully-coupled atmosphere-ocean model.

<sup>b</sup> aerosol optical depth (AOD).

## REFERENCES

- 1 S. Tilmes, R. R. Garcia, D. E. Kinnison, A. Gettelman and P. J. Rasch, *Journal of Geophysical Research: Atmospheres*, DOI:10.1029/2008JD011420.
- 2 P. Heckendorn, D. Weisenstein, S. Fueglistaler, B. P. Luo, E. Rozanov, M. Schraner, L. W. Thomason and T. Peter, *Environmental Research Letters*, 2009, **4**, 045108.
- 3 B. Kravitz, A. Robock, D. T. Shindell and M. A. Miller, *Journal of Geophysical Research: Atmospheres*, 2012, **117**, n/a-n/a.
- 4 M. Kuebbeler, U. Lohmann and J. Feichter, *Geophys Res Lett*, 2012, **39**, 23803.
- 5 A. J. Ferraro, E. J. Highwood and A. J. Charlton-Perez, *Environmental Research Letters*, 2014, **9**, 014001.
- 6 G. Pitari, V. Aquila, B. Kravitz, A. Robock, S. Watanabe, I. Cionni, N. Luca, G. Genova, E. Mancini and S. Tilmes, *J Geophys Res*, 2014, **119**, 2629–2653.
- 7 K. E. Taylor, R. J. Stouffer and G. A. Meehl, *Bull Am Meteorol Soc*, 2012, **93**, 485–498.
- 8 D. K. Weisenstein, D. W. Keith and J. A. Dykema, *Atmos Chem Phys*, 2015, **15**, 11835–11859.
- 9 A. C. Jones, J. M. Haywood and A. Jones, *Atmos Chem Phys*, 2016, **16**, 2843–2862.
- 10 J. A. Dykema, D. W. Keith and F. N. Keutsch, *Geophys Res Lett*, 2016, **43**, 7758–7766.
- 11 D. W. Keith, D. K. Weisenstein, J. A. Dykema and F. N. Keutsch, *Proc Natl Acad Sci U S A*, 2016, **113**, 14910–14914.
- 12 A. C. Jones, J. M. Haywood, N. Dunstone, K. Emanuel, M. K. Hawcroft, K. I. Hodges and A. Jones, *Nat Commun*, 2017, **8**, 1–10.
- 13 L. Xia, P. J. Nowack, S. Tilmes and A. Robock, *Atmos. Chem. Phys*, 2017, **17**, 11913–11928.
- 14 J. Proctor, S. Hsiang, J. Burney, M. Burke and W. Schlenker, *Nature*, 2018, **560**, 480–483.
- 15 Z. Dai, D. K. Weisenstein, F. N. Keutsch and D. W. Keith, *Commun Earth Environ*, 2020, **1**, 1–9.
- 16 D. Vioni, D. G. Macmartin, B. Kravitz, O. Boucher, A. Jones, T. Lurton, M. Martine, M. J. Mills, P. Nabat, U. Niemeier, R. Séférian and S. Tilmes, *Atmos Chem Phys*, 2021, **21**, 10039–10063.
- 17 S. Tilmes, D. Vioni, A. Jones, J. Haywood, R. Séférian, P. Nabat, O. Boucher, E. M. Bednarz and U. Niemeier, *Atmos Chem Phys*, 2022, **22**, 4557–4579.

- 18 B. C. O'Neill, C. Tebaldi, D. P. Van Vuuren, V. Eyring, P. Friedlingstein, G. Hurtt, R. Knutti, E. Kriegler, J. F. Lamarque, J. Lowe, G. A. Meehl, R. Moss, K. Riahi and B. M. Sanderson, *Geosci Model Dev*, 2016, **9**, 3461–3482.
